# Supplementary material
Source: Elsevier journal article supplement (https://www.sciencedirect.com/science/article/pii/S0025775315005825)
Supplement: mmc1 [file S0025775315005825:mmc1.doc]

**CUESTIONARIO AUTO-ADMINISTRADO PARA EVALUAR LA SEVERIDAD DE LOS SÍNTOMAS Y SITUACIÓN FUNCIONAL EN EL SÍNDROME DEL TÚNEL CARPIANO.**

**ESCALA DE SEVERIDAD DE LOS SÍNTOMAS**

Las siguientes preguntas se refieren a sus síntomas en un día de las 2 últimas semanas. Por favor, señale haciendo un círculo sobre el número que mejor describa su situación.

¿Cómo es de intenso el dolor que tiene durante la noche en la mano y muñeca?

1. Durante la noche no tengo dolor en la mano y muñeca
2. Dolor leve
3. Dolor moderado
4. Dolor intenso
5. Dolor muy intenso

¿En las pasadas 2 semanas, con qué frecuencia el dolor de la mano y muñeca le despierta durante la noche?

1. Nunca
2. Una vez
3. Dos o tres veces
4. Cuatro o cinco veces
5. Más de cinco veces

¿Tiene dolor de mano y muñeca durante el día?

1. Nunca tengo dolor durante el día
2. Tengo dolor leve durante el día
3. Tengo dolor moderado durante el día
4. Tengo dolor intenso durante el día
5. Tengo dolor muy intenso durante el día
6. How often do you have hand or wrist pain during the daytime?

¿Con qué frecuencia tiene dolor de mano y muñeca durante el día?

1. Nunca
2. Una o dos veces al día
3. Tres a cinco veces al día
4. Más de cinco veces al día
5. El dolor es constante

¿Cuánto dura por término medio, un episodio de dolor durante el día?

1. Nunca tengo dolor durante el día
2. Menos de 10 minutos
3. 10 a 60 minutos
4. Más de 60 minutos
5. El dolor es constante durante todo el día

¿Tiene usted entumecimiento (sensación de falta de sensibilidad) en su mano?

1. No
2. Tengo entumecimiento leve
3. Tengo entumecimiento moderado
4. Tengo entumecimiento intenso
5. Tengo entumecimiento muy intenso

¿Tiene usted debilidad en su mano o muñeca?

1. No
2. Debilidad leve
3. Debilidad moderada
4. Debilidad intensa
5. Debilidad muy intensa

¿Siente usted sensación de hormigueo en su mano?

1. No
2. Siento un hormigueo leve
3. Siento un hormigueo moderado
4. Siento un hormigueo intenso
5. Siento un hormigueo muy intenso

¿Cómo es de intenso el entumecimiento (falta de sensibilidad) y el hormigueo durante la noche?

1. No tengo durante la noche
2. Leve
3. Moderado
4. Intenso
5. Muy intenso

¿Con qué frecuencia el entumecimiento y hormigueo le despertó durante la noche estas últimas 2 semanas?

1. Nunca
2. Una vez
3. Dos a tres veces
4. Cuatro a cinco veces
5. Más de cinco veces

¿Tiene dificultades para agarrar o para manejar objetos de pequeño tamaño con la mano, como una llave o un bolígrafo?

1. No tengo dificultad
2. Dificultad leve
3. Dificultad moderada
4. Dificultad intensa
5. Dificultad muy intensa

**ESCALA DE SITUACIÓN FUNCIONAL**

¿En un día con síntomas, de las pasadas dos semanas tuvo dificultades para realizar alguna de las siguientes actividades siguientes? Por favor, señale haciendo un círculo sobre el número que mejor describa su situación.

| **Actividad** | **Ninguna dificultad** | **Leve dificultad** | **Moderada dificultad** | **Gran dificultad** | **Imposible de hacer debido a los síntomas** |
| --- | --- | --- | --- | --- | --- |
| Escribir | 1 | 2 | 3 | 4 | 5 |
| Abrochar los botones | 1 | 2 | 3 | 4 | 5 |
| Sostener un libro al leer | 1 | 2 | 3 | 4 | 5 |
| Coger y mantener el teléfono | 1 | 2 | 3 | 4 | 5 |
| Abrir un recipiente de cristal | 1 | 2 | 3 | 4 | 5 |
| Realizar las tareas del hogar | 1 | 2 | 3 | 4 | 5 |
| Llevar las bolsas de la compra | 1 | 2 | 3 | 4 | 5 |
| Bañarse y vestirse | 1 | 2 | 3 | 4 | 5 |
